# Supplementary material for: Neurological symptoms in COVID-19: a cross-sectional monocentric study of hospitalized patients
Source: Springer Nature journal article supplement (doi:10.1186/s42466-021-00116-1), 2021-03-12

**A**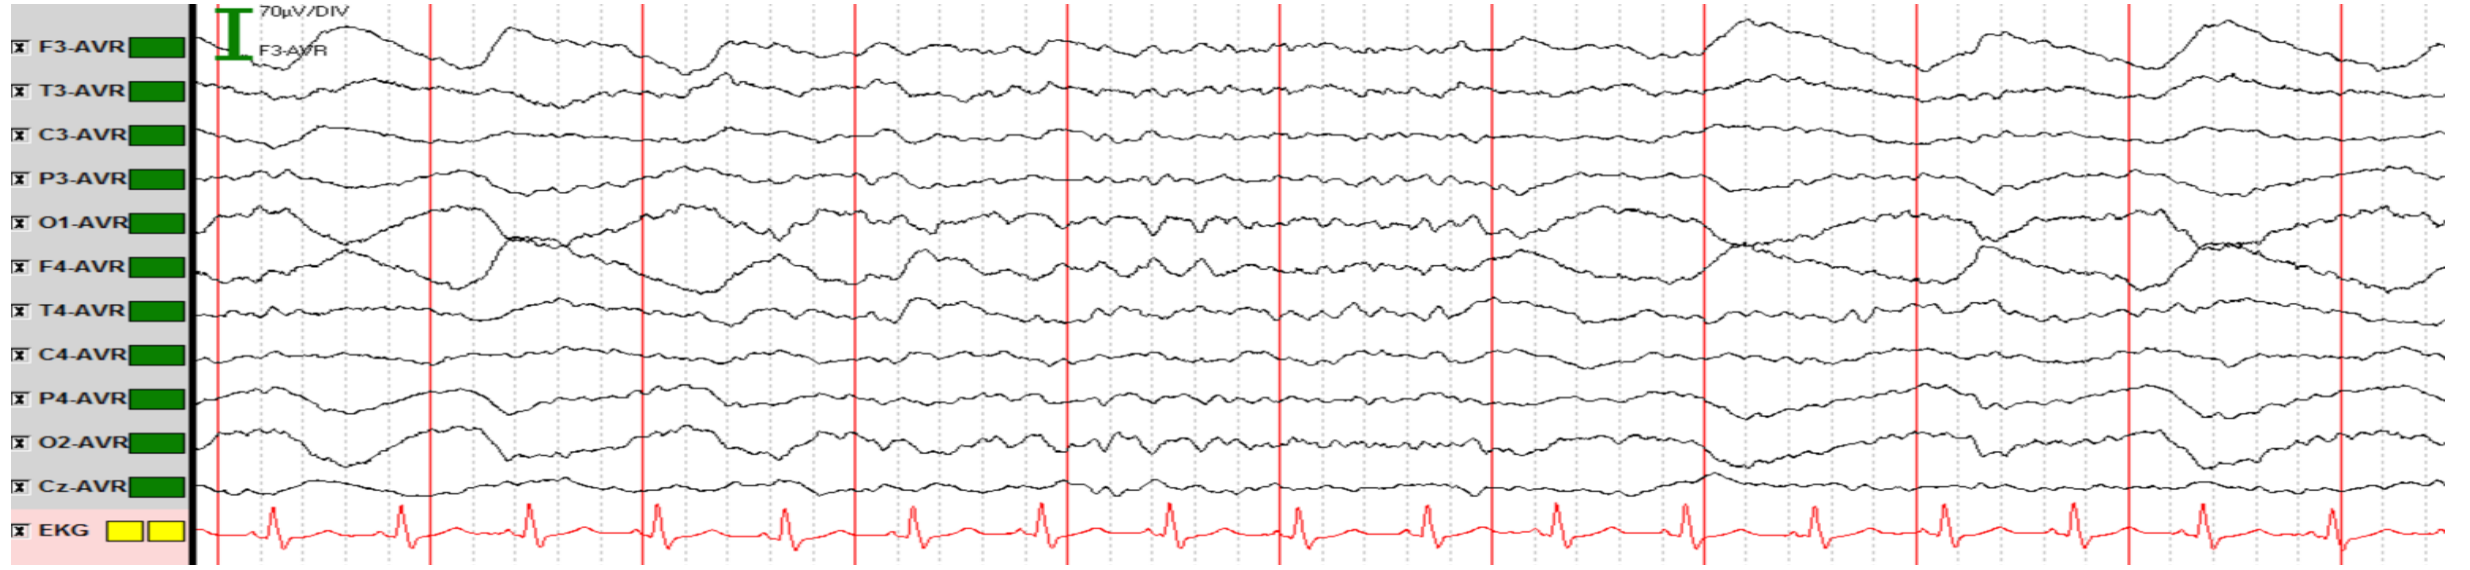**B**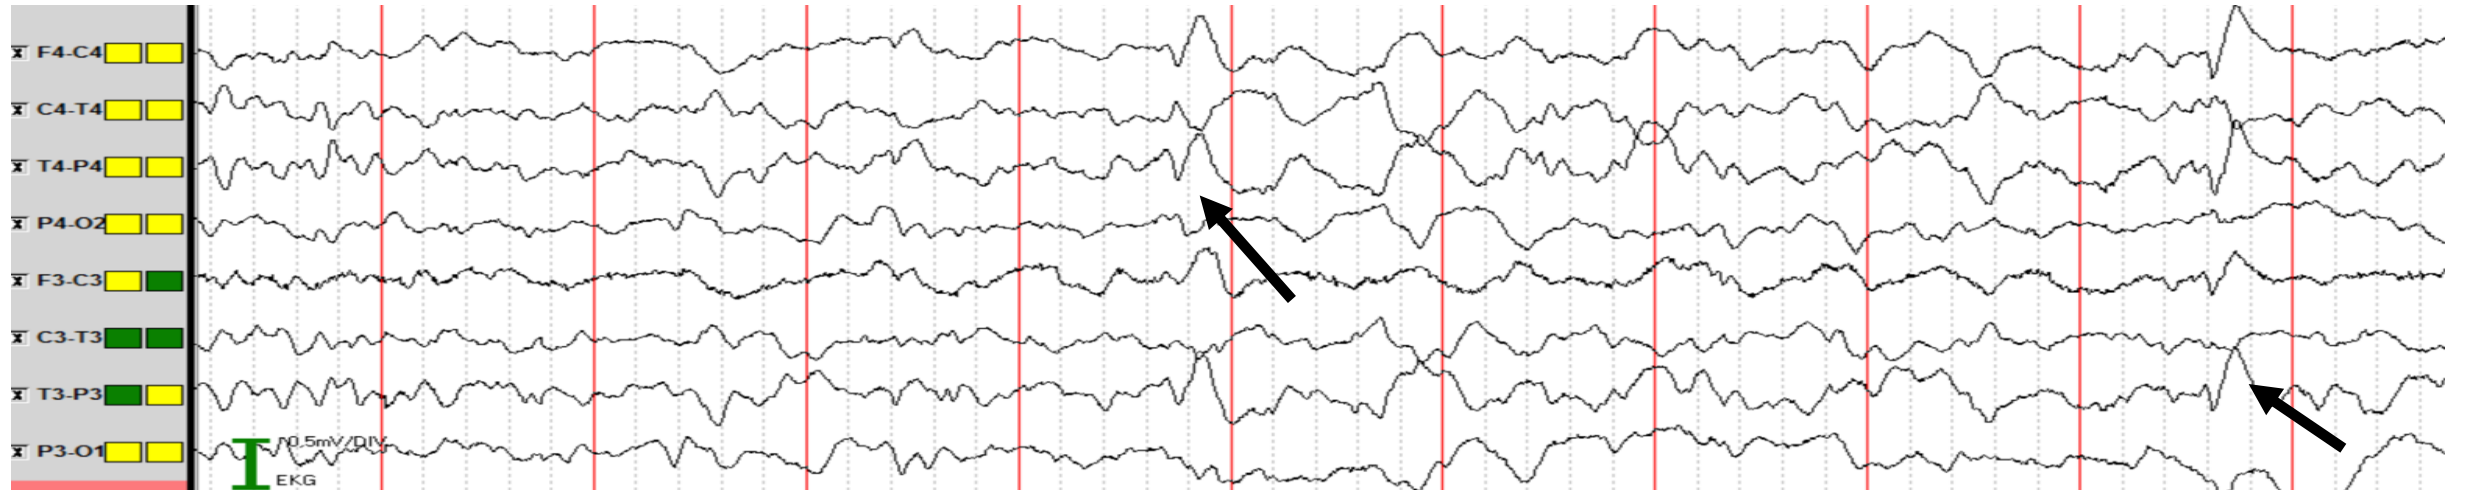

Supplement: MOESM3 [file 18959822]
